# Supplementary material for: Multi-decadal atmospheric carbon dioxide measurements in Hungary, central Europe
Source: Copernicus journal article supplement (doi:10.5194/amt-17-4629-2024), 2024-08-09
Supplement: Supplementary file 1 [file amt-17-4629-2024-supplement.pdf]

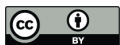

*Supplement of*

## **Multi-decadal atmospheric carbon dioxide measurements in Hungary, central Europe**

**László Haszpra**

*Correspondence to:* László Haszpra ([haszpra.laszlo@atomki.hu](mailto:haszpra.laszlo@atomki.hu))

The copyright of individual parts of the supplement might differ from the article licence.

## SUPPLEMENTARY FIGURES

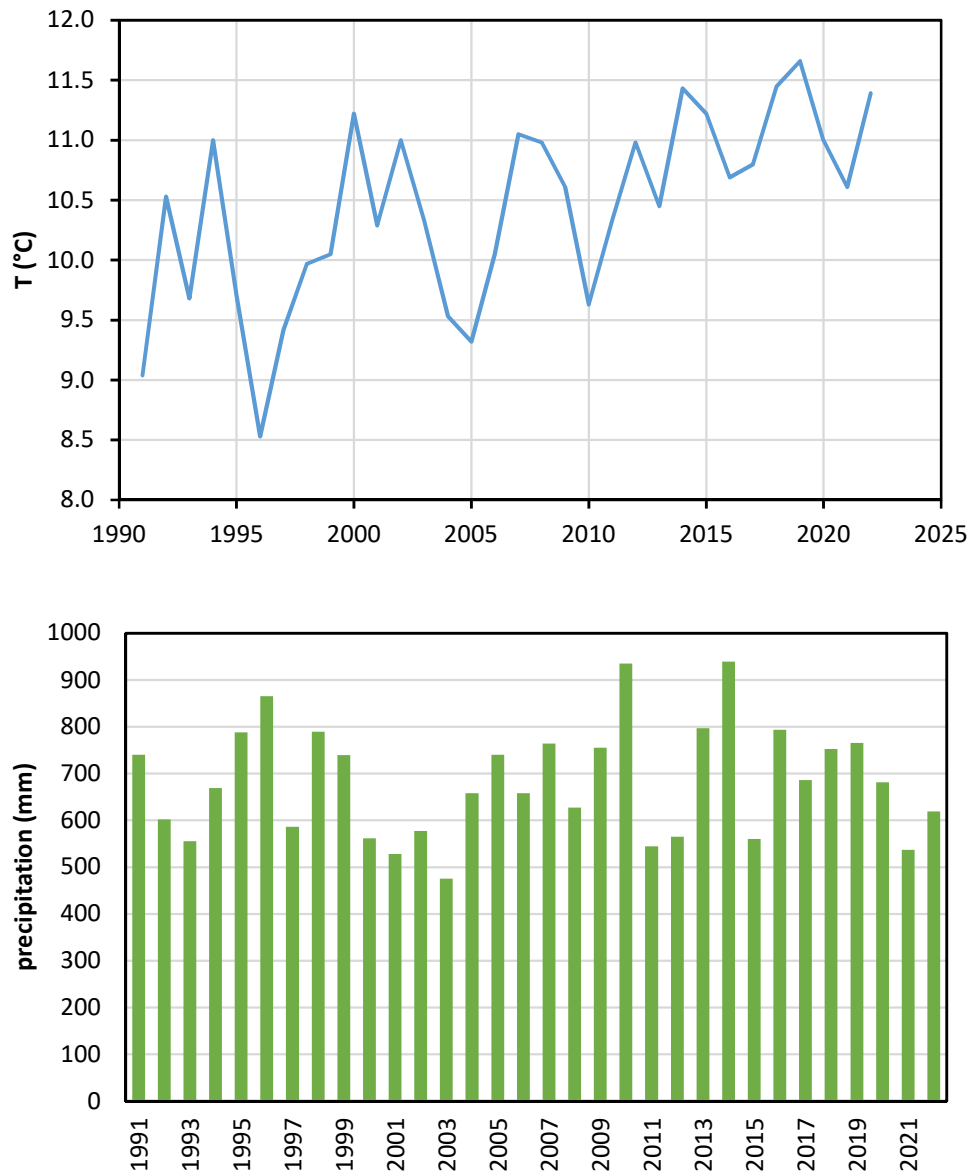

Figure S1: Temporal variation of the annual mean temperature (upper panel) and the annual amount of precipitation (lower panel) at HUN (Hungarian Meteorological Service, 2023). The positive trend in temperature (1991-2020:  $0.54 \pm 0.13$  °C decade<sup>-1</sup>) is statistically significant at  $p < 0.01$ . Statistically significant changes in the precipitation amount cannot be detected.

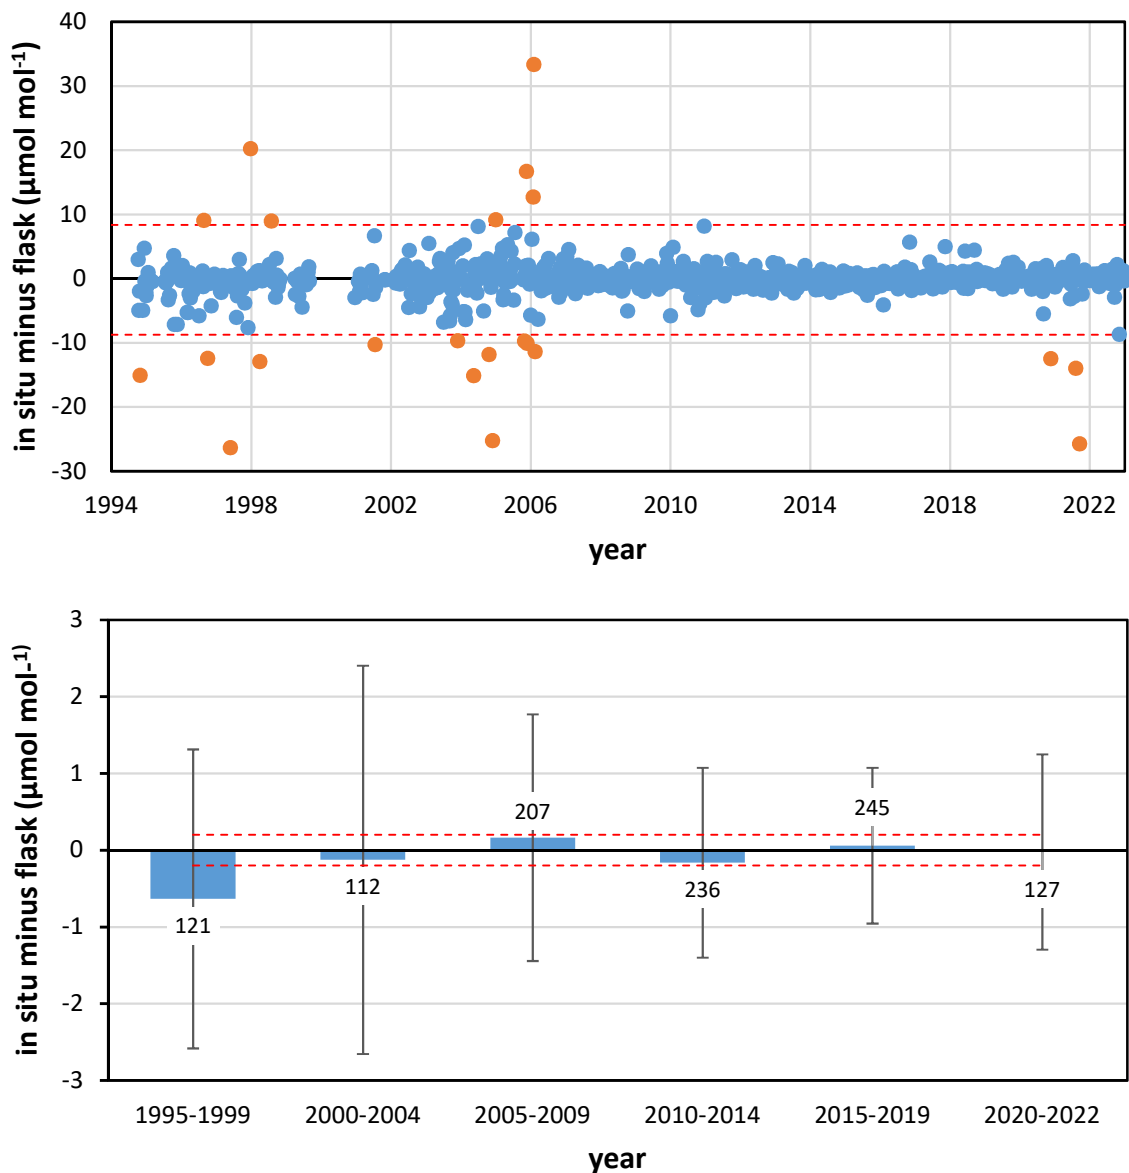

Figure S2: Comparison of CO<sub>2</sub> concentrations measured from flask samples and by the in situ analyzer. The in situ analyzer sequentially samples the intakes along the tower with an 8-minute cycle time. The in situ concentration values in the figures are the averages of the measurements performed at 82 m and 115 m elevations within the  $\pm 20$ -minute time window around the nominal sampling time of the flask samples taken at 96 m above the ground. The **upper panel** shows all available data pairs (the flask data was downloaded from [https://gml.noaa.gov/aftp/data/trace\\_gases/co2/flask/surface/txt/co2\\_hun\\_surface-flask\\_1\\_ccgg\\_event.txt](https://gml.noaa.gov/aftp/data/trace_gases/co2/flask/surface/txt/co2_hun_surface-flask_1_ccgg_event.txt) on 7 June 2024 – Lan et al., 2023). The red dashed horizontal lines indicate the 3-sigma range used for the definition of the extreme outliers to be rejected. The **lower panel** shows the average bias of the in situ measurements from the flask measurements, as well as the standard deviation of the bias and the number of data aggregated in 5-year periods (3 years for 2020-2022). The red dashed horizontal lines indicate the WMO extended network compatibility goal range ( $0.2 \mu\text{mol mol}^{-1}$  – WMO, 2020).

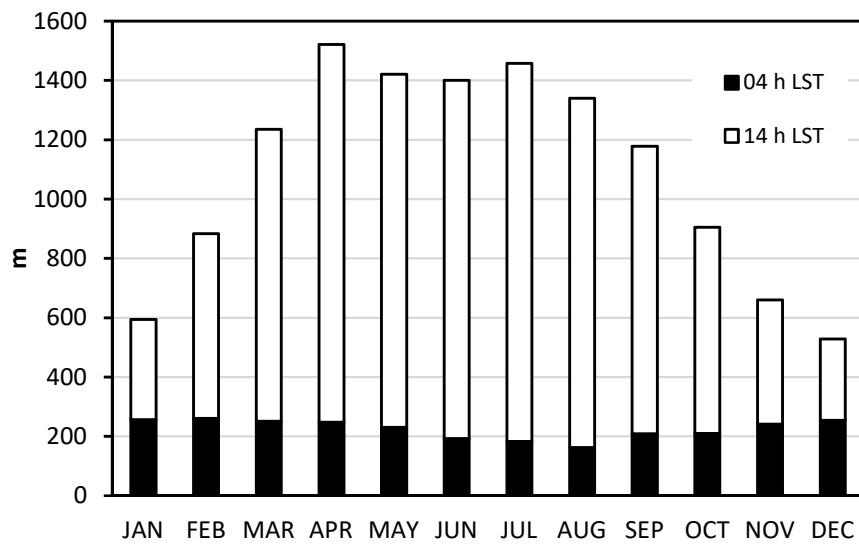

Figure S3: Mean seasonal variation of the nighttime (4 h local standard time) and early afternoon (14 h local standard time) height of the planetary boundary layer (1994-2022). Data are based on ECMWF ERA5 reanalysis (03 and 13 UTC) accessed on 8 October 2023

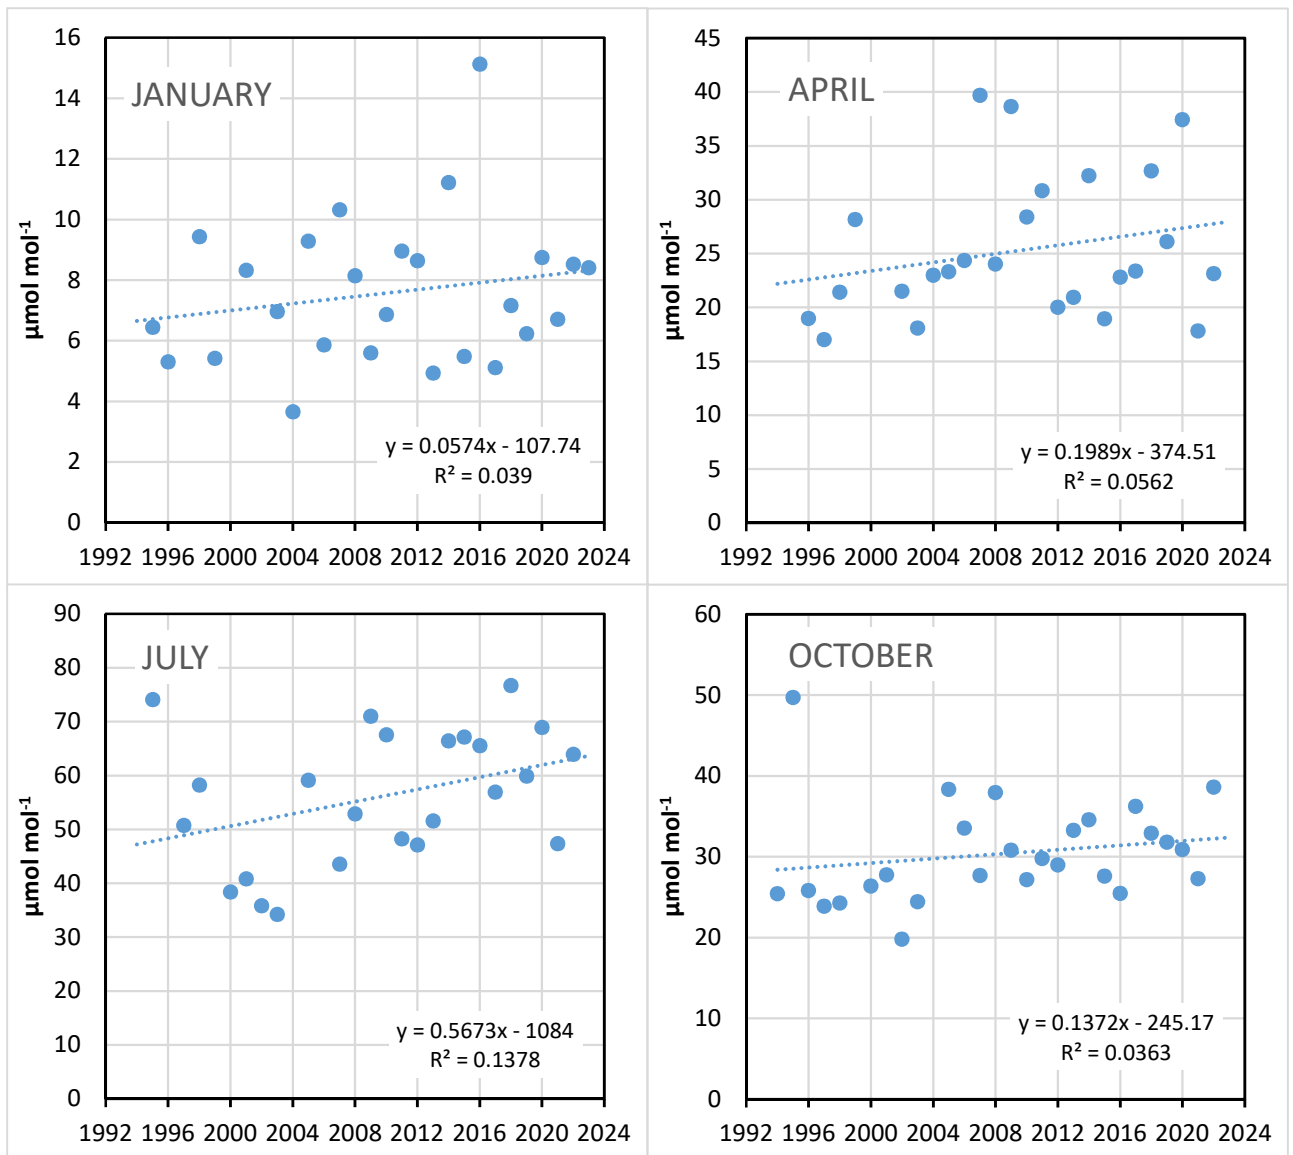

Figure S4: Temporal variation of the monthly mean diurnal amplitude of CO<sub>2</sub> concentration at 10 m elevation

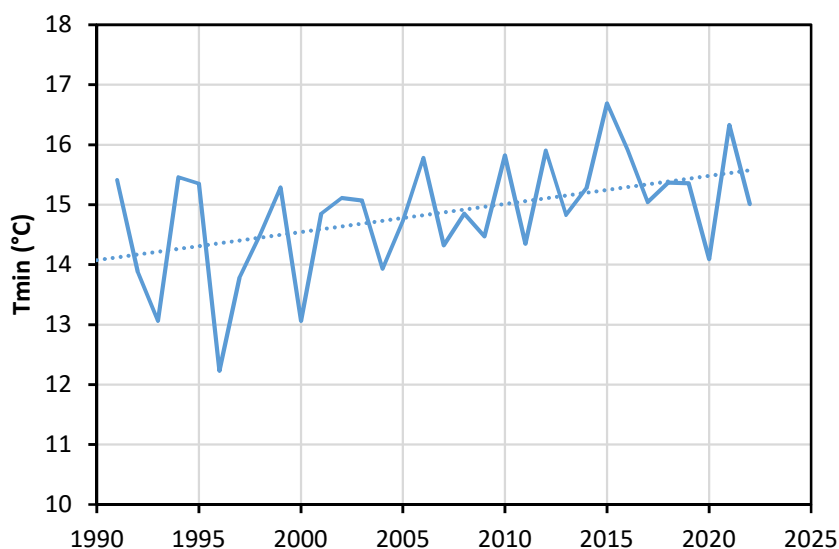

Figure S5: Temporal variation of the mean daily minimum temperature at Hegyhátsál in July. The trend ( $0.47 \pm 0.17 \text{ } ^\circ\text{C decade}^{-1}$ ) is statistically significant at  $p < 0.01$ .

## References

- Carbon Portal ICOS RI: STILT station characterization for Hegyhátsál at 115m, <https://hdl.handle.net/11676/P8ovRbMVpf26-XIBpq14UBbV>, 2024.
- Hungarian Meteorological Service: Meteorological Database, [https://odp.met.hu/climate/homogenized\\_data/gridded\\_data\\_series/daily\\_data\\_series/](https://odp.met.hu/climate/homogenized_data/gridded_data_series/daily_data_series/), - last accessed 12 September 2023, 2023.
- Lan, X., Mund, J. W., Crotwell, A. M., Crotwell, M. J., Moglia, E., Madronich, M., D. Neff, and Thoning, K. W.: Atmospheric carbon dioxide dry air mole fractions from the NOAA GML Carbon Cycle Cooperative Global Air Sampling Network, 1968-2022, Version: 2023-08-28, <https://doi.org/https://doi.org/10.15138/wkgj-f215>, 2023.
- WMO: 20th WMO/IAEA Meeting on Carbon Dioxide, Other Greenhouse Gases and Related Measurement Techniques (GGMT-2019), Jeju Island, South Korea, 2-5 September 2019 (Eds.: A. Crotwell, H. Lee and M. Steinbacher), GAW Report, 255, [https://library.wmo.int/viewer/57135/download?file=Final\\_GAW\\_57255.pdf&type=pdf&navigator=57131](https://library.wmo.int/viewer/57135/download?file=Final_GAW_57255.pdf&type=pdf&navigator=57131), 2020.
